# Supplementary material for: Development and Process Optimization of a Steamed Fish Paste Cake Prototype for Room Temperature Distribution
Source: MDPI journal article supplement (doi:10.3390/pr12040795), 2024-04-15
Supplement: s1 [file s1]

Supplementary File

# Development and Process Optimization of a Steamed Fish Paste Cake Prototype for Room Temperature Distribution

Jin-Hwa Lee <sup>1,†</sup>, Sang In Kang <sup>2,†</sup>, Sana Mansoor <sup>1</sup>, Inhwan Lee<sup>1</sup>, Do Youb Kim <sup>3</sup>, Ye Youl Kim <sup>3</sup>, Yongjoon Park <sup>3</sup>, Jae-Hak Sohn <sup>2,4</sup>, Khawaja Muhammad Imran Bashir <sup>1,5,\*</sup>, and Jae-Suk Choi <sup>1,\*</sup>

<sup>1</sup> Department of Seafood Science and Technology, Institute of Marine Industry, Gyeongsang National University, Tongyeong 53064, Republic of Korea; evolution\_5237@gnu.ac.kr (J.H.L.); sanamansoorahmad@gmail.com (S.M.)

<sup>2</sup> Seafood Research Center, IACF, Silla University, Busan 49277, Republic of Korea; ftrnd5@silla.ac.kr (S.I.K.); jhsohn@silla.ac.kr (J.-H.S.)

<sup>3</sup> Samjin Food Co. Ltd, Busan 49036, Republic of Korea; kim926@samjinfood.com (D.Y.K.); dudndi1324@samjinfood.com (Y.Y.K.); sj0001@samjinfood.com (Y.-J.P.)

<sup>4</sup> Department of Food Science and Culinary Arts, College of Health and Welfare, Silla University, Busan 46958, Republic of Korea

<sup>5</sup> German Engineering Research and Development Center for Life Science Technologies in Medicine and Environment, Busan 46742, Republic of Korea

\* Correspondence: imran.bashir@lstme.org (K.M.I.B.); jsc1008@gnu.ac.kr (J.-S.C.); Tel.: +82-51-899-8000 (K.M.I.B.); +82-55-772-9142 (J.-S.C.)

† These authors contributed equally to this work.

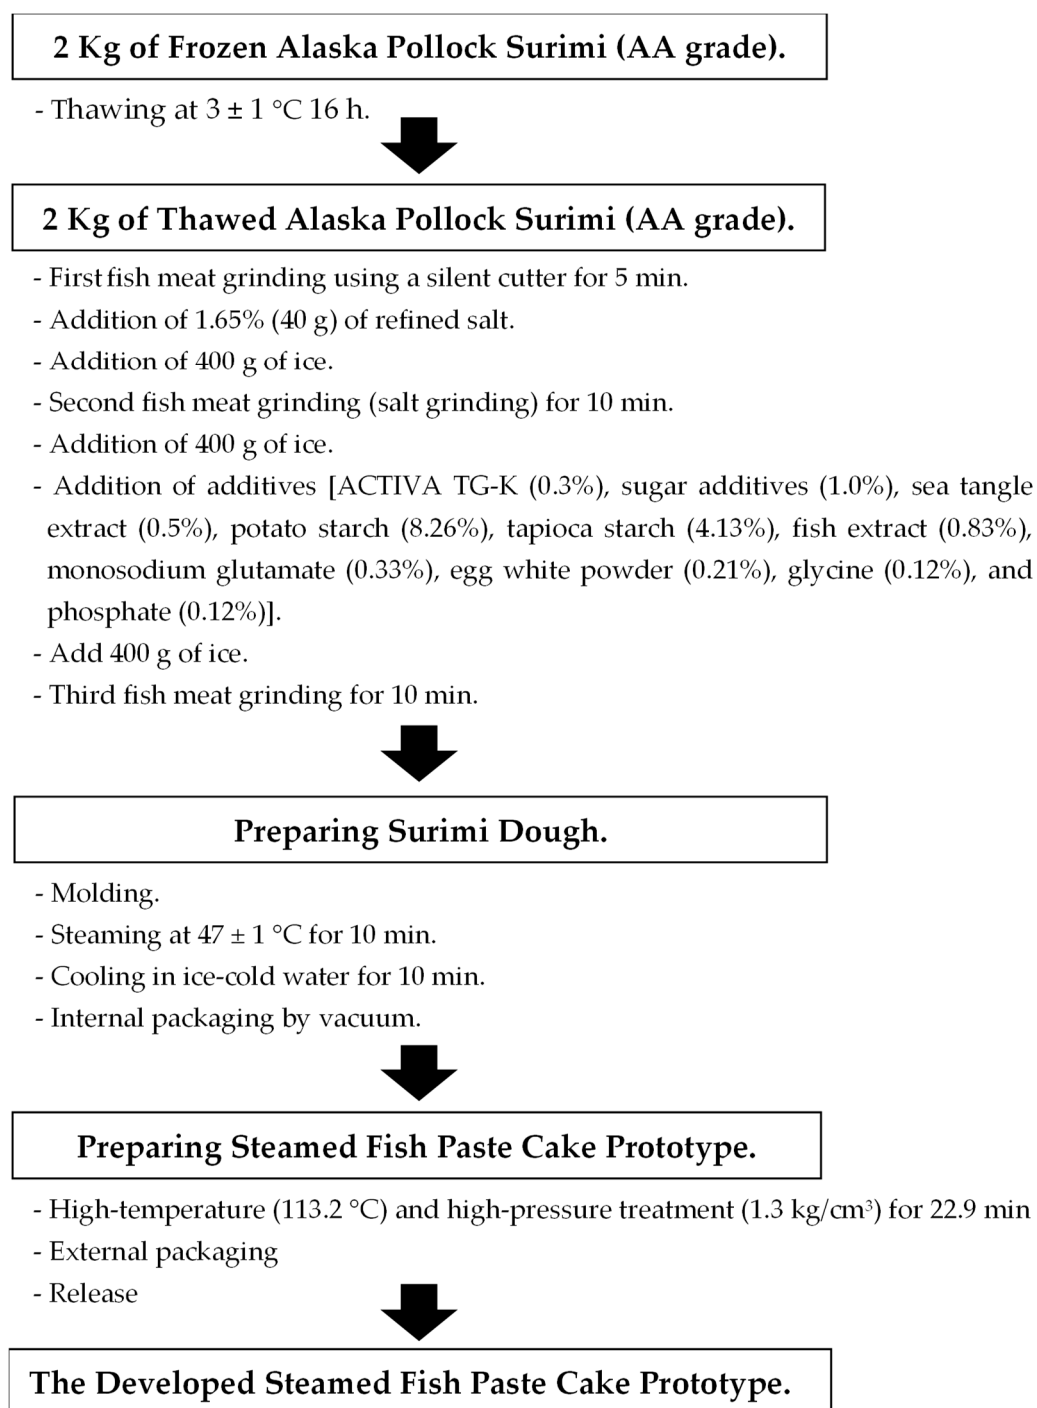

**Figure S1.** Schematic diagram showing the optimized processing conditions for preparing the steamed fish paste cake prototype.

**Table S1.** Signs of independent variables presented by central synthesis plan, their codes, and actual values.

| Independent variable | Sign           | Range  |       |       |       |        |
|----------------------|----------------|--------|-------|-------|-------|--------|
|                      |                | -1.414 | -1    | 0     | +1    | +1.414 |
| Temperature (°C)     | X <sub>1</sub> | 107.9  | 110.0 | 115.0 | 120.0 | 122.1  |
| Time (min)           | X <sub>2</sub> | 22.9   | 25.0  | 30.0  | 35.0  | 37.1   |

X<sub>1</sub>: High-temperature processing temperature, °C; X<sub>2</sub>: High-temperature and high-pressure treatment time, min.

**Table S2.** Codes and actual values of samples used for optimizing processing conditions of independent variables based on central synthesis plan.

| Coefficients<br>assessed by    | Sample No. | Codes      |             | Actual values |             |
|--------------------------------|------------|------------|-------------|---------------|-------------|
|                                |            | $X_1$ (°C) | $X_2$ (Min) | $Y_1$ (°C)    | $Y_2$ (Min) |
| Fractional<br>factorial design | 1          | -1.000     | -1.000      | 110.0         | 25.0        |
|                                | 2          | 1.000      | -1.000      | 120.0         | 25.0        |
|                                | 3          | -1.000     | 1.000       | 110.0         | 35.0        |
|                                | 4          | 1.000      | 1.000       | 120.0         | 35.0        |
| Star point                     | 5          | -1.414     | 0.000       | 107.9         | 30.0        |
|                                | 6          | 1.414      | 0.000       | 122.1         | 30.0        |
|                                | 7          | 0.000      | -1.414      | 115.0         | 22.9        |
|                                | 8          | 0.000      | 1.414       | 115.0         | 37.1        |
| Central point                  | 9          | 0.000      | 0.000       | 115.0         | 30.0        |
|                                | 10         | 0.000      | 0.000       | 115.0         | 30.0        |
|                                | 11         | 0.000      | 0.000       | 115.0         | 30.0        |

$X_1$ : High-temperature processing temperature, °C;  $X_2$ : High-temperature and high-pressure treatment time, min;  $Y_1$ : Gel strength, g × cm;  $Y_2$ : Whiteness;  $Y_3$ : Sensory score.

**Table S3.** Attributes, descriptors, definitions, and standard point criteria for descriptive analysis.

| Attributes | Descriptors | Definitions                                   | Standard points |
|------------|-------------|-----------------------------------------------|-----------------|
| Taste      | Umami taste | 5.0% MSG solution                             | 1.5             |
|            |             | 10.0% MSG solution                            | 3.5             |
|            |             | S-brand vegetable fish paste cake             | 4.0             |
|            |             | G-brand fish paste cake bar                   | 4.5             |
|            |             | C-brand grilled mackerel                      | 0.5             |
| Smell      | Fishy taste | C-brand grilled mackerel and grilled flounder | 1.5             |
|            |             | S-brand canned sardine                        | 2.0             |
|            |             | S-brand vegetable fish paste cake             | 4.0             |
|            |             | G-brand fish paste cake bar                   | 4.0             |
| Appearance | Color       | Munsell Tablecolor 0.2Y 4.8/4.9 (Brown)       | 0.5             |
|            |             | Munsell Tablecolor 2.5Y 8.0/1.5 (Ivory)       | 2.5             |
|            |             | Munsell Table color 9.5N (White)              | 5.0             |
|            |             | Acorn paste                                   | 0.5             |
| Texture    | Elasticity  | S-brand vegetable fish paste cake             | 1.5             |
|            |             | Konjac                                        | 2.0             |
|            |             | G-brand fish paste cake bar                   | 3.5             |
|            |             | Grape flavored jelly                          | 5.0             |

**Table S4.** Dependent variables for optimizing manufacturing conditions of steamed fish paste cake prototype.

| Sample No. | Independent variables |                | Dependent variables |                |                |
|------------|-----------------------|----------------|---------------------|----------------|----------------|
|            | X <sub>1</sub>        | X <sub>2</sub> | Y <sub>1</sub>      | Y <sub>2</sub> | Y <sub>3</sub> |
| 1          | 110.0                 | 25.0           | 127.7               | 62.9           | 4.4            |
| 2          | 120.0                 | 25.0           | 108.9               | 46.7           | 5.5            |
| 3          | 110.0                 | 35.0           | 125.8               | 54.7           | 6.5            |
| 4          | 120.0                 | 35.0           | 94.1                | 45.5           | 7.5            |
| 5          | 107.9                 | 30.0           | 131.5               | 58.9           | 5.5            |
| 6          | 122.1                 | 30.0           | 101.6               | 37.4           | 7.2            |
| 7          | 115.0                 | 22.9           | 123.5               | 55.7           | 4.9            |
| 8          | 115.0                 | 37.1           | 114.1               | 50.5           | 6.4            |
| 9          | 115.0                 | 30.0           | 120.3               | 52.8           | 7.5            |
| 10         | 115.0                 | 30.0           | 119.1               | 52.1           | 7.8            |
| 11         | 115.0                 | 30.0           | 118.0               | 53.0           | 7.8            |

X<sub>1</sub>: High-temperature processing temperature, °C; X<sub>2</sub>: High-temperature and high-pressure treatment time, min; Y<sub>1</sub>: Gel strength, g × cm; Y<sub>2</sub>: Whiteness; Y<sub>3</sub>: Sensory score.

**Table S5.** Estimation coefficient and *p* value of quadratic regression equation for optimizing manufacturing conditions of steamed fish paste cake prototype.

| Variable                      | Y <sub>1</sub> |                | Y <sub>2</sub> |                | Y <sub>3</sub> |                |
|-------------------------------|----------------|----------------|----------------|----------------|----------------|----------------|
|                               | Coefficient    | <i>p</i> value | Coefficient    | <i>p</i> value | Coefficient    | <i>p</i> value |
| Constant                      | 119.113        | 0.000          | 52.6333        | 0.000          | 7.7000         | 0.000          |
| X <sub>1</sub>                | -11.598        | 0.000          | -6.9757        | 0.000          | 0.5630         | 0.005          |
| X <sub>2</sub>                | -3.749         | 0.012          | -2.0942        | 0.010          | 0.7777         | 0.001          |
| X <sub>1</sub> X <sub>1</sub> | -2.179         | 0.118          | -1.7854        | 0.034          | -0.6813        | 0.005          |
| X <sub>2</sub> X <sub>2</sub> | -1.054         | 0.404          | 0.6896         | 0.315          | -1.0313        | 0.001          |
| X <sub>1</sub> X <sub>2</sub> | -3.225         | 0.066          | 1.7500         | 0.063          | -0.0250        | 0.887          |

Y<sub>1</sub>: Gel strength, g × cm; Y<sub>2</sub>: Whiteness; Y<sub>3</sub>: Sensory score; X<sub>1</sub>: High-temperature processing temperature, °C; X<sub>2</sub>: High-temperature and high-pressure treatment time, min; X<sub>1</sub>X<sub>1</sub>, X<sub>2</sub>X<sub>2</sub>, and X<sub>1</sub>X<sub>2</sub>: Coefficients of the quadratic regression equation.

**Table S6.** Correlation between independent and dependent variables for the reaction model equation of steamed fish paste cake prototype optimal manufacturing conditions.

| Dependent variable | Sources       | DF | SS      | MS      | F value | p value |
|--------------------|---------------|----|---------|---------|---------|---------|
| Y <sub>1</sub>     | Model         | 5  | 1258.06 | 251.612 | 33.34   | 0.001   |
|                    | Linear        | 2  | 1188.58 | 594.292 | 78.74   | 0.000   |
|                    | Square        | 2  | 27.87   | 13.936  | 1.85    | 0.251   |
|                    | Cross-product | 1  | 41.60   | 41.603  | 5.51    | 0.066   |
|                    | Residual      | 5  | 37.74   | 7.548   | -       | -       |
|                    | Lack of fit   | 3  | 35.09   | 11.697  | 8.84    | 0.103   |
|                    | Pure error    | 2  | 2.65    | 1.323   | -       | -       |
|                    | Total         | 10 | 1295.80 | -       | -       | -       |
| Y <sub>2</sub>     | Model         | 5  | 463.742 | 92.748  | 43.09   | 0.000   |
|                    | Linear        | 2  | 424.370 | 212.185 | 98.57   | 0.000   |
|                    | Square        | 2  | 27.123  | 13.561  | 6.30    | 0.043   |
|                    | Cross-product | 1  | 12.250  | 12.250  | 5.69    | 0.063   |
|                    | Residual      | 5  | 10.763  | 2.153   | -       | -       |
|                    | Lack of fit   | 3  | 10.317  | 3.439   | 15.40   | 0.062   |
|                    | Pure error    | 2  | 0.447   | 0.223   | -       | -       |
|                    | Total         | 10 | 474.505 | -       | -       | -       |
| Y <sub>3</sub>     | Model         | 5  | 14.2651 | 2.8530  | 25.37   | 0.001   |
|                    | Linear        | 2  | 7.3740  | 3.6870  | 32.79   | 0.001   |
|                    | Square        | 2  | 6.8885  | 3.4443  | 30.63   | 0.002   |
|                    | Cross-product | 1  | 0.0025  | 0.0025  | 0.020   | 0.887   |
|                    | Residual      | 5  | 0.5622  | 0.1124  | -       | -       |
|                    | Lack of fit   | 3  | 0.5022  | 0.1674  | 5.58    | 0.156   |
|                    | Pure error    | 2  | 0.0600  | 0.0300  | -       | -       |
|                    | Total         | 10 | 14.8273 | -       | -       | -       |

DF: Degree of freedom; SS: Sum of squares; MS: Mean square value; Y<sub>1</sub>: Gel strength, g × cm; Y<sub>2</sub>: Whiteness; Y<sub>3</sub>: Sensory score.



**Table S7.** Predicted optimal conditions for manufacturing steamed fish paste cake prototype using MINITAB statistical program.

| Independent variable                                | Value |          | X <sub>1</sub>                                                                      |          | X <sub>2</sub>                                                                        |
|-----------------------------------------------------|-------|----------|-------------------------------------------------------------------------------------|----------|---------------------------------------------------------------------------------------|
| Y <sub>1</sub>                                      | TV    | 120.0    | 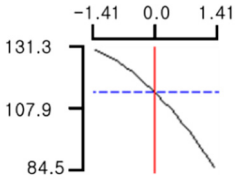   | 120.0    |    |
|                                                     | CV    | 0.0      |                                                                                     | -0.25    |                                                                                       |
|                                                     | AC    | 115.0    |                                                                                     | 28.8     |                                                                                       |
| Y <sub>2</sub>                                      | TV    | 55.0     |    | 55.0     |    |
|                                                     | CV    | 0.0      |                                                                                     | -0.88    |                                                                                       |
|                                                     | AC    | 115.0    |                                                                                     | 25.6     |                                                                                       |
| Y <sub>3</sub>                                      | TV    | 9.0      |   | 9.0      |   |
|                                                     | CV    | 0.21     |                                                                                     | 0.40     |                                                                                       |
|                                                     | AC    | 118.2    |                                                                                     | 33.9     |                                                                                       |
| Optimization conditions for all dependent variables | CV    | -0.3637  |  | -0.0240  |  |
|                                                     | AC    | 113.2 °C |                                                                                     | 29.9 min |                                                                                       |

TV: Target value; CV: Code value; AC: Actual value; X<sub>1</sub>: High-temperature processing temperature, °C; X<sub>2</sub>: High-temperature and high-pressure treatment time, min; Y<sub>1</sub>: Gel strength, g × cm; Y<sub>2</sub>: Whiteness; Y<sub>3</sub>: Sensory score.
